# Supplementary material for: Assessment of the Influence of the Selected Range of Visible Light Radiation on the Durability of the Gel with Ascorbic Acid and Its Derivative
Source: MDPI journal article supplement (doi:10.3390/ijms23158759), 2022-08-06
Supplement: s1 [file s1]

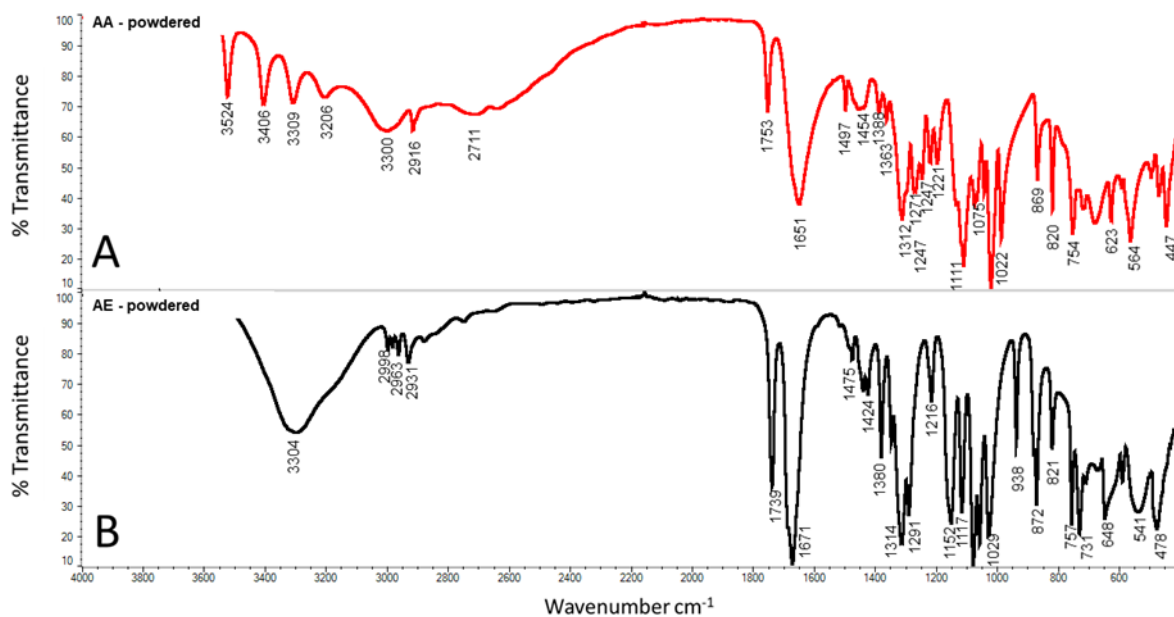

Figure S1. FTIR spectrum of dried preparation: (A) AA - powdered, (B) AE – powdered.

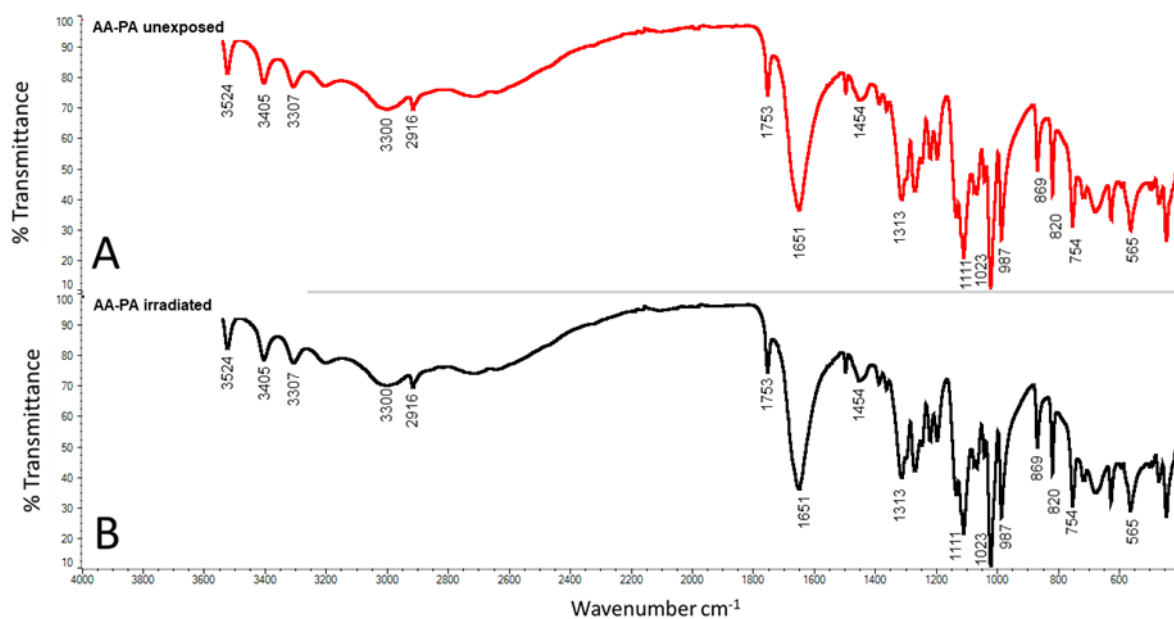

Figure S2. FTIR spectrum of freeze-dried preparation: (A) unexposed preparation AA-PA, (B) irradiated preparation AA-PA; composition of the preparation is given in the Table 2.

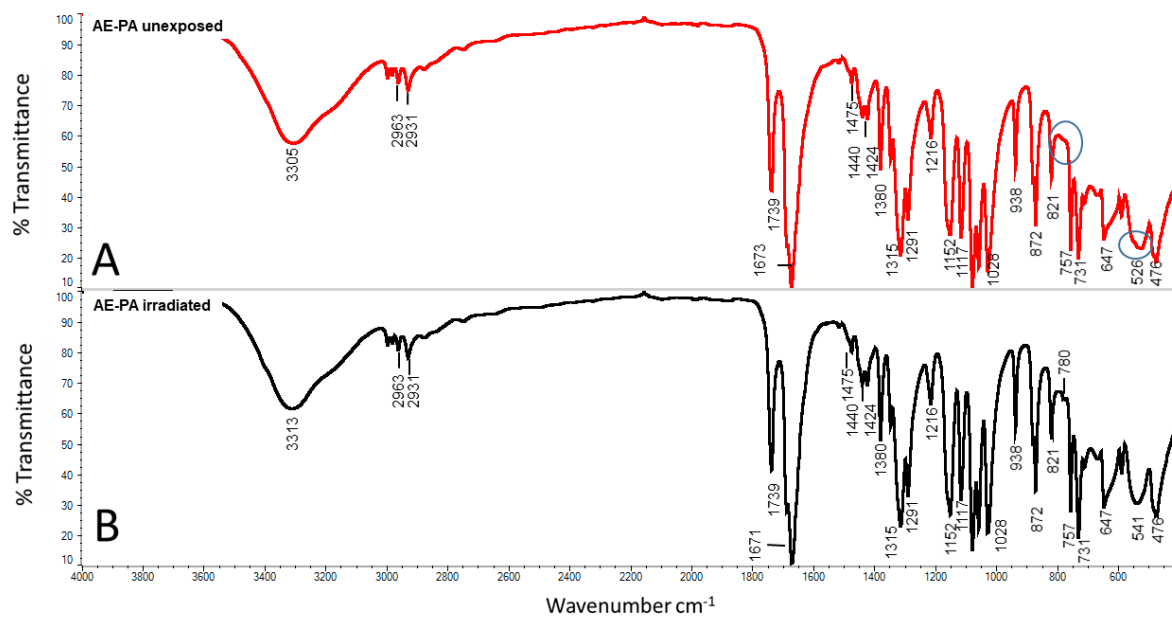

Figure S3. FTIR spectrum of freeze-dried preparation: (A) unexposed preparation AE-PA, (B) irradiated preparation AE-PA; composition of the preparation is given in the Table 2. The blue circle shows the differences.

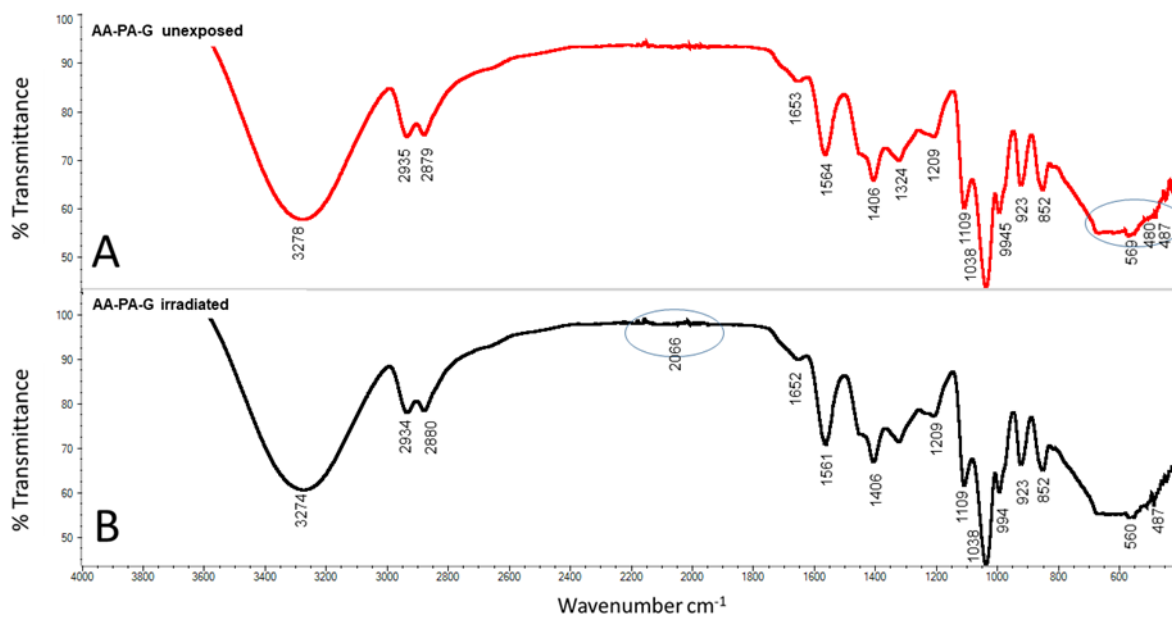

Figure S4. FTIR spectrum of freeze-dried preparation: (A) unexposed preparation AA-PA-G, (B) irradiated preparation AA-PA-G; composition of the preparation is given in the Table 2. The blue circle shows the differences.

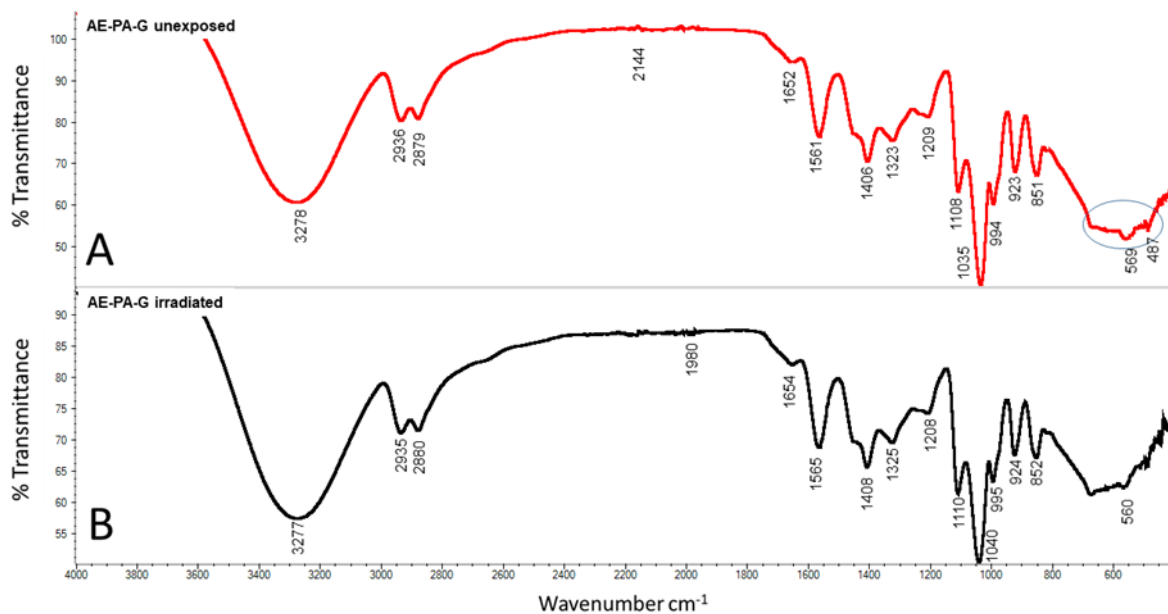

Figure S5. FTIR spectrum of freeze-dried preparation: (A) unexposed preparation AE-PA-G, (B) irradiated preparation AE-PA-G; composition of the preparation is given in the Table 2. The blue circle shows the differences.

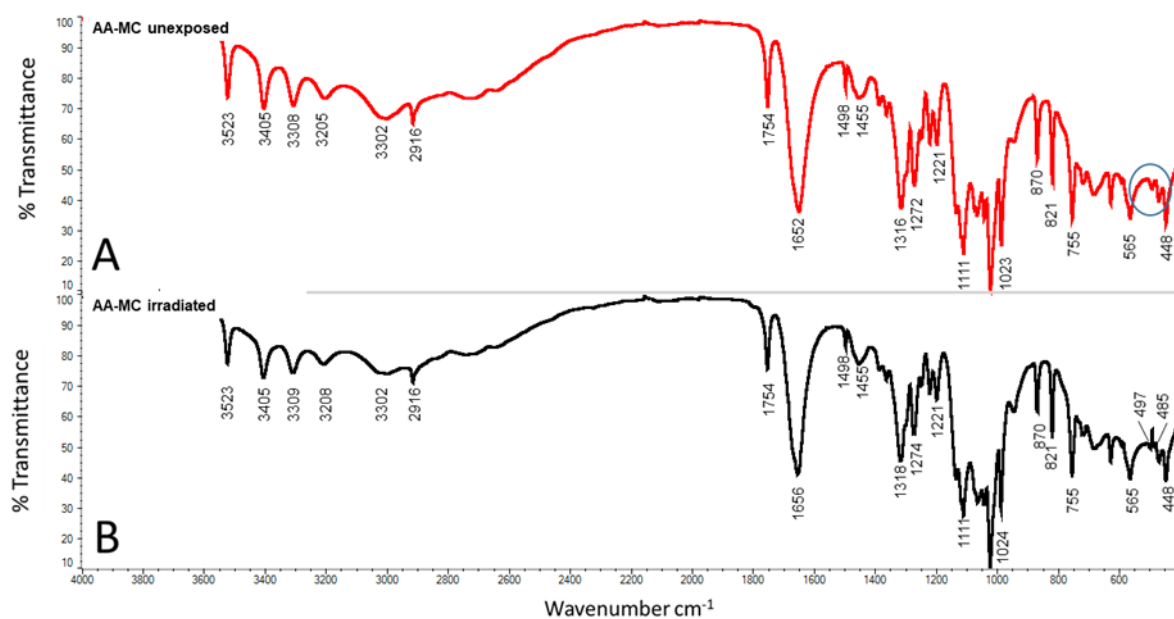

Figure S6. FTIR spectrum of freeze-dried preparation: (A) unexposed preparation AA-MC, (B) irradiated preparation AA-MC; composition of the preparation is given in the Table 2. The blue circle shows the differences.

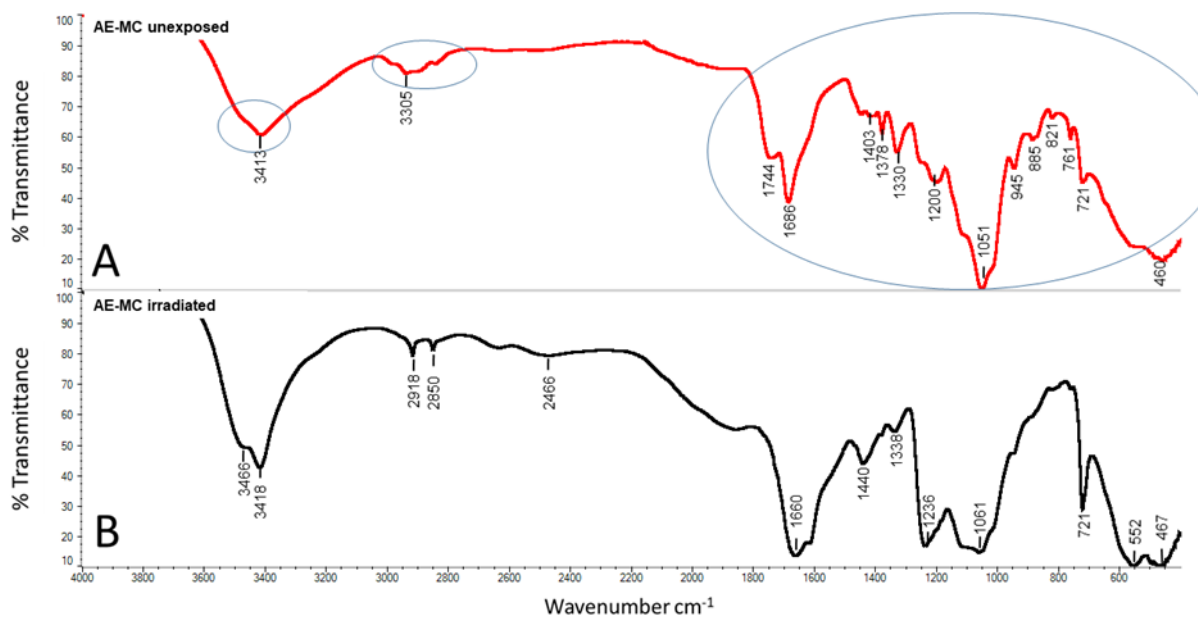

Figure S7. FTIR spectrum of freeze-dried preparation: (A) unexposed preparation AE-MC, (B) irradiated preparation AE-MC; composition of the preparation is given in the Table 2. The blue circle shows the differences.

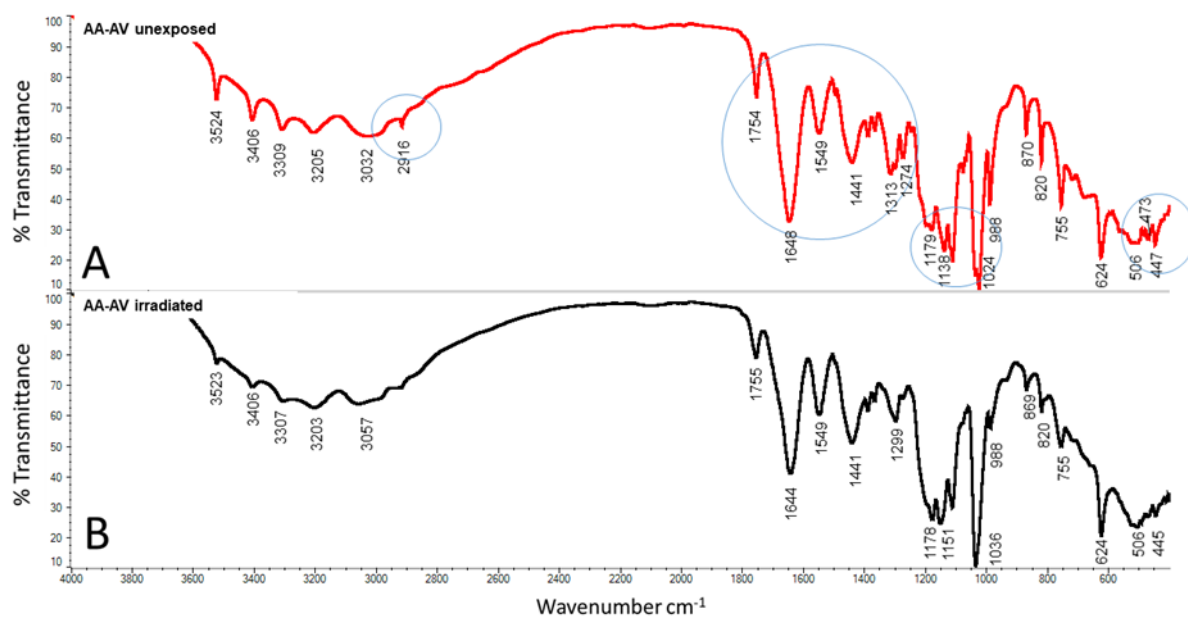

Figure S8. FTIR spectrum of freeze-dried preparation: (A) unexposed preparation AA-AV, (B) irradiated preparation AA-AV; composition of the preparation is given in the Table 2. The blue circle shows the differences.

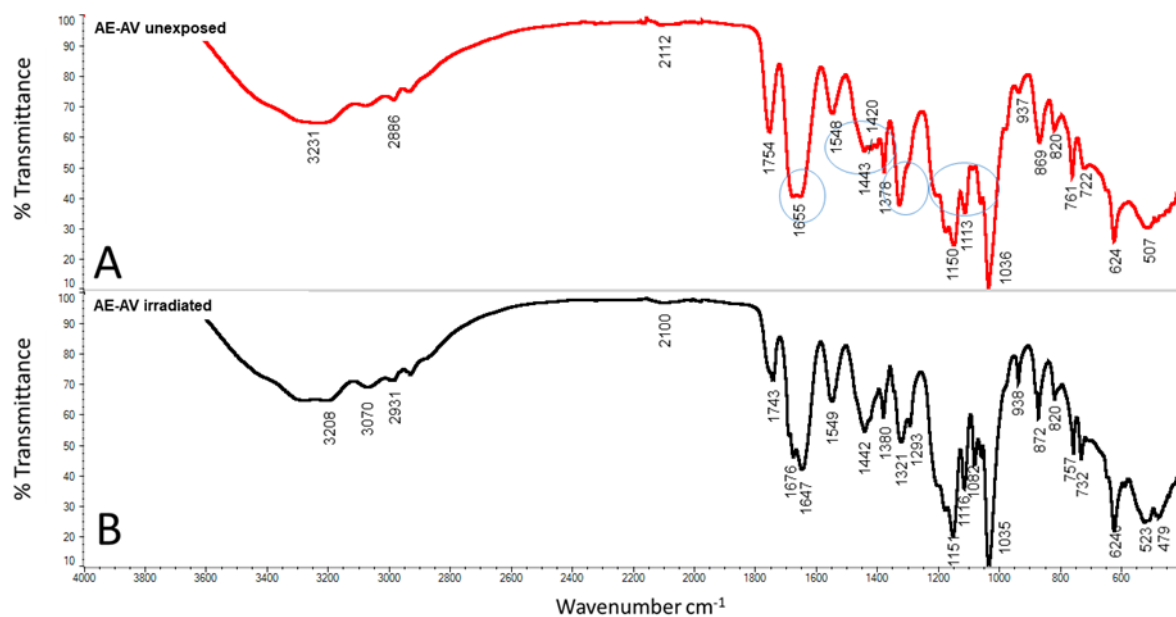

Figure S9. FTIR spectrum of freeze-dried preparation: (A) unexposed preparation AE-AV, (B) irradiated preparation AE-AV; composition of the preparation is given in the Table 2. The blue circle shows the differences.
